# Supplementary material
Source: PubMed Central journal article supplement (PMC2875815)

1           **Supplemental Figure 1:** Pie charts generated by the Gene Ontology function in GeneSifter  
2 showing major Biological Process (**A**) and Molecular Function (**B**) ontologies that changed with loss of  
3 *Meg3*. Biological Process ontologies related to cellular and metabolic processes (23.22% and 16.83%,  
4 respectively) changed the most with loss of *Meg3*. Molecular Function ontologies related to binding  
5 (53.75%) changed the most in *Meg3*-null embryos relative to wild-type.

# Supplemental 1A

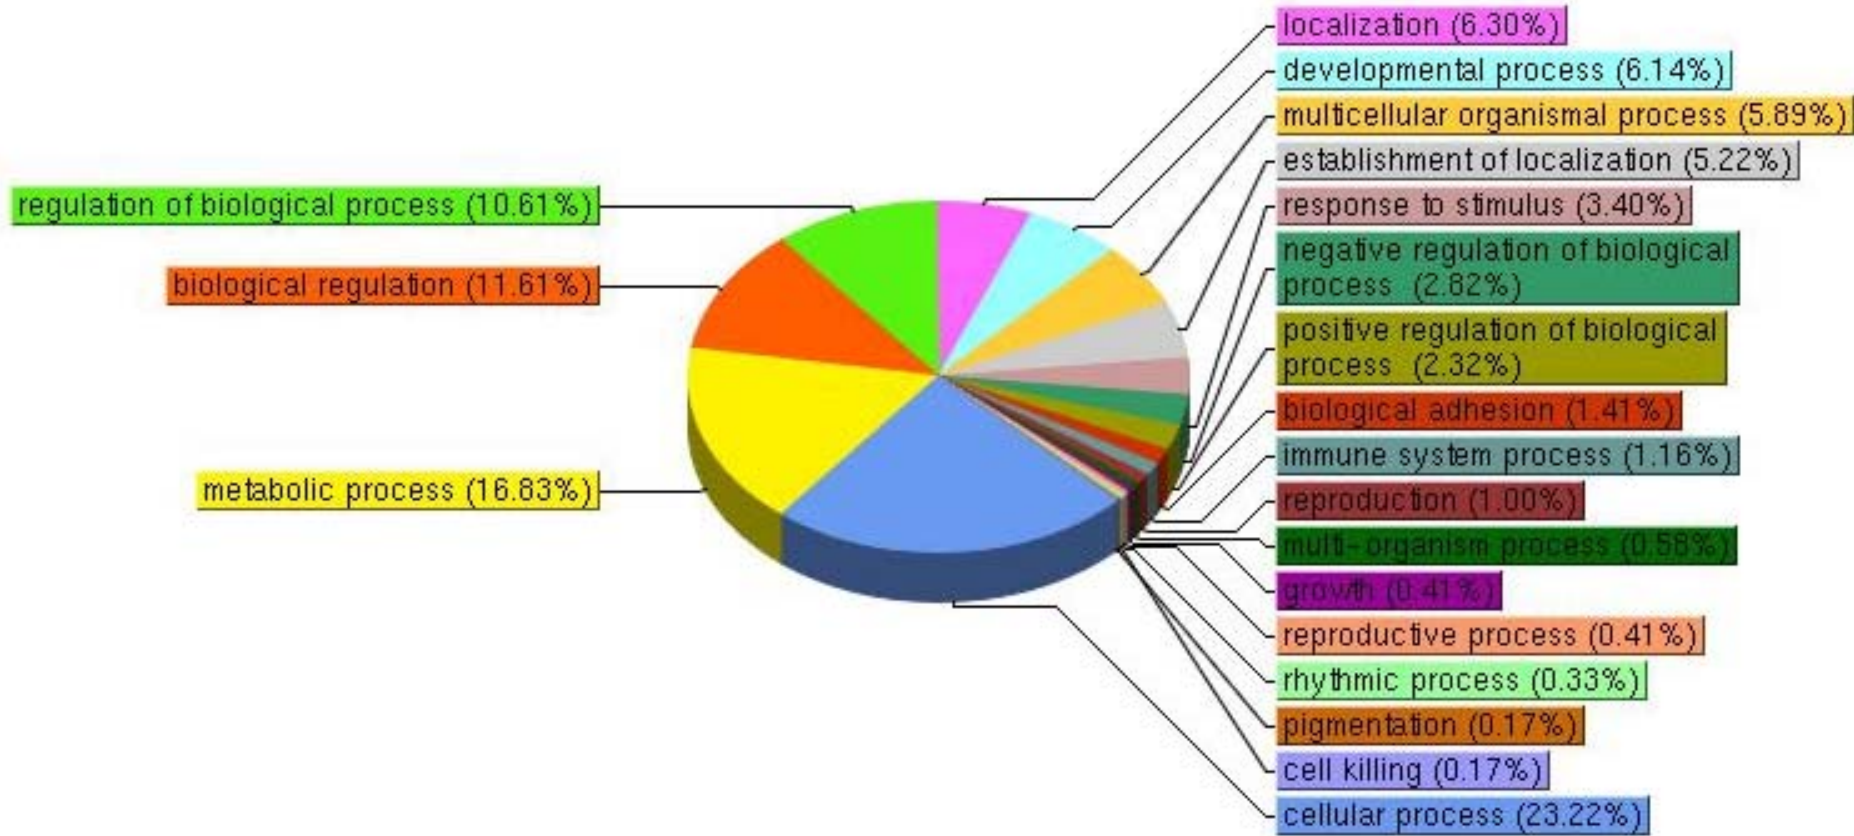

## Supplemental 1B

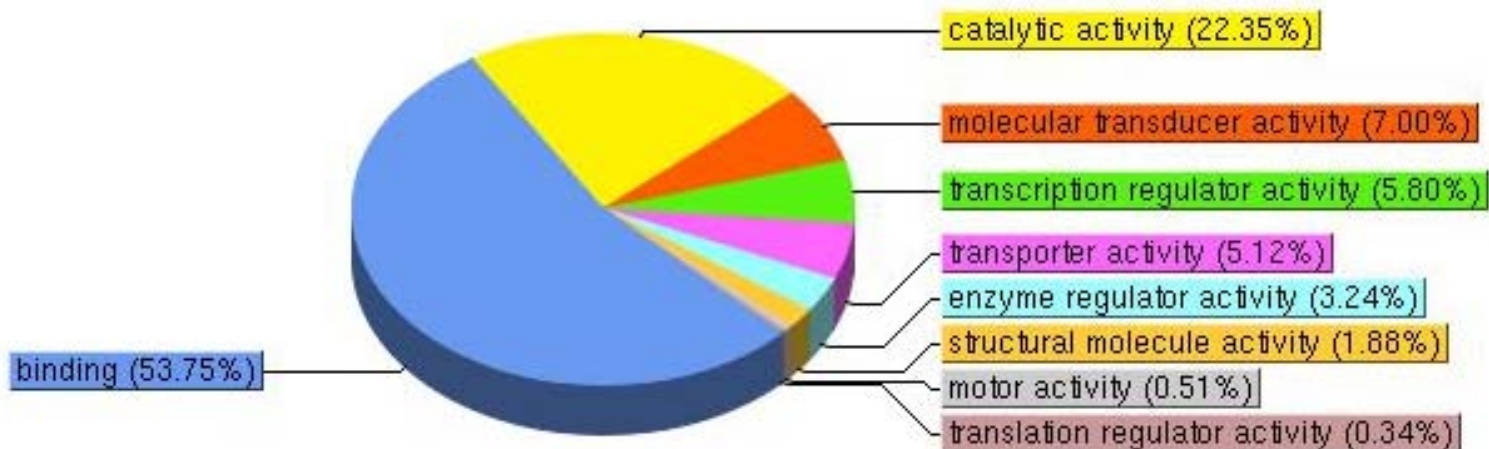

Supplement: en.2009-1151_1.pdf [file en.2009-1151_1.pdf]
